# Supplementary material
Source: PubMed Central journal article supplement (PMC2932634)

Calcium binding residue prediction  
Set 0 vs. 1  
Receiver Operator Characteristic

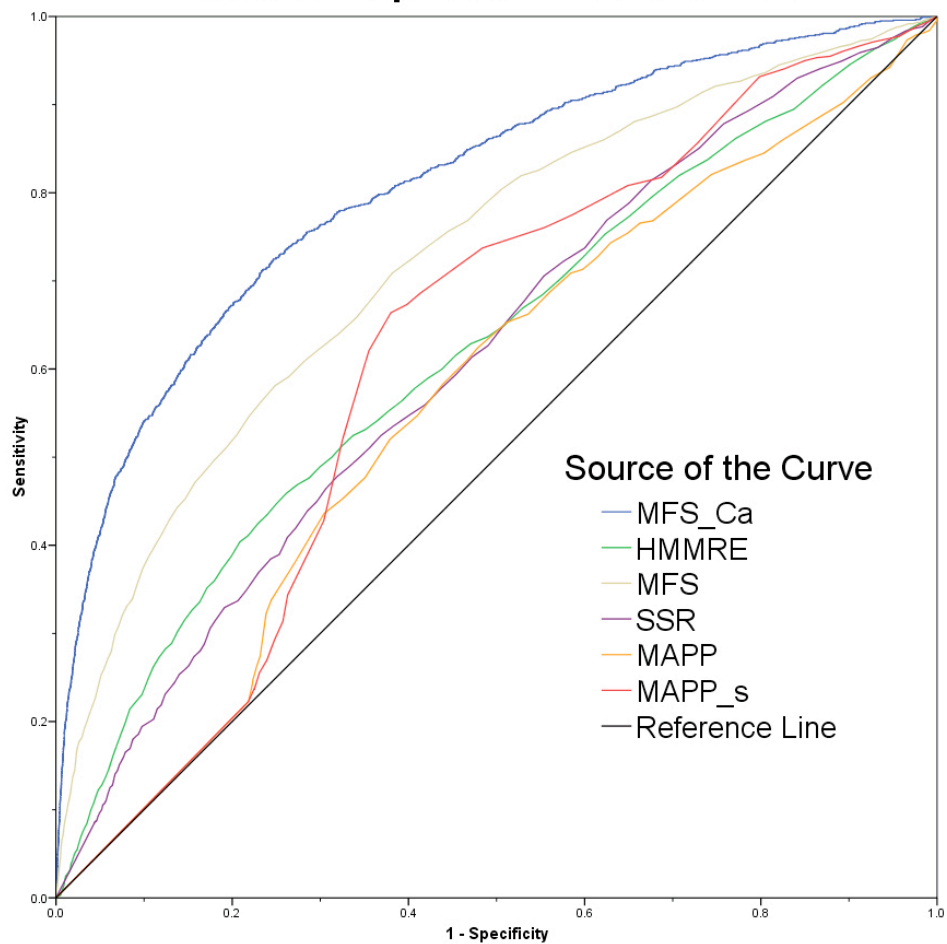

Calcium binding residue prediction  
Set 1 vs. 0  
Receiver Operator Characteristic

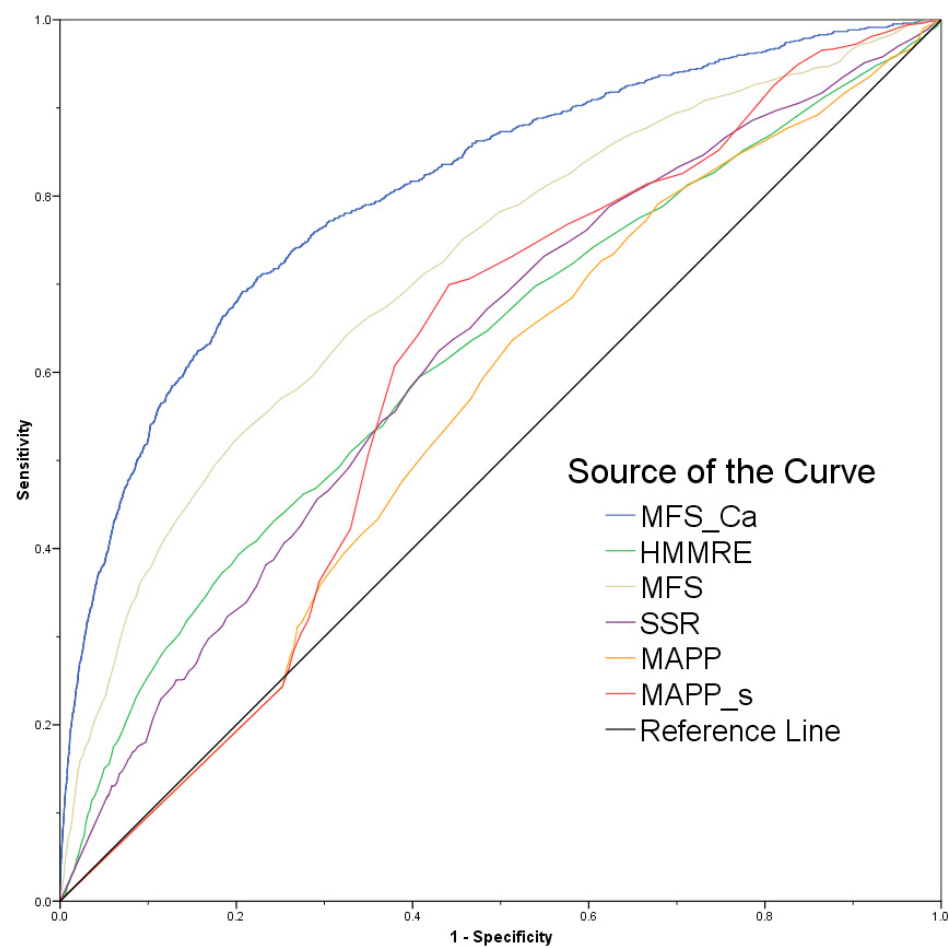

Supplement: NIHMS207746-supplement-01.pdf [file NIHMS207746-supplement-01.pdf]
